# Supplementary material for: Ultradian rhythms of AKT phosphorylation and gene expression emerge in the absence of the circadian clock components Per1 and Per2
Source: PubMed Central journal article supplement (PMC8718012; doi:10.1371/journal.pbio.3001492), 2021-12-30

**Fig. 1A**

CT (h) 12 15 18 21 24 27 30 33 36 39 42 45

kDa

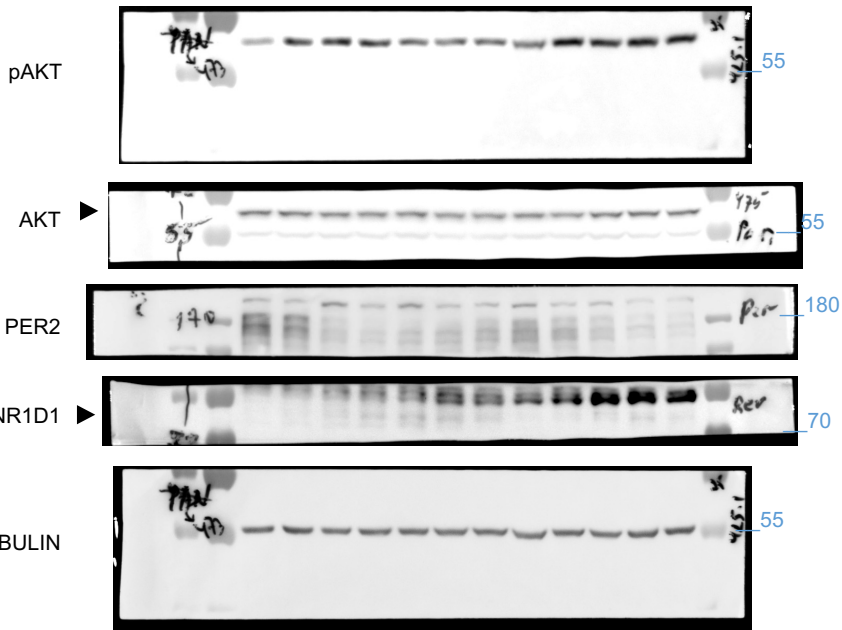

CT (h) 39 42 45 48 51 54 57 60 63 66 69 72

kDa

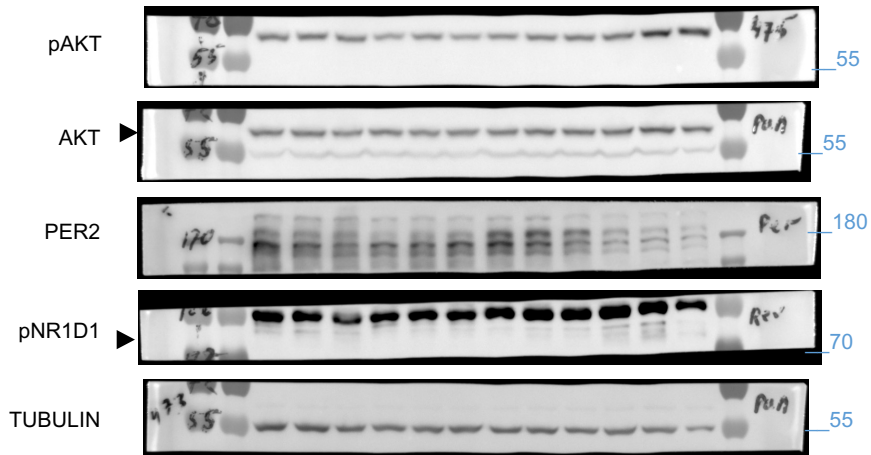

**Fig. 2A**

*Wild Type*

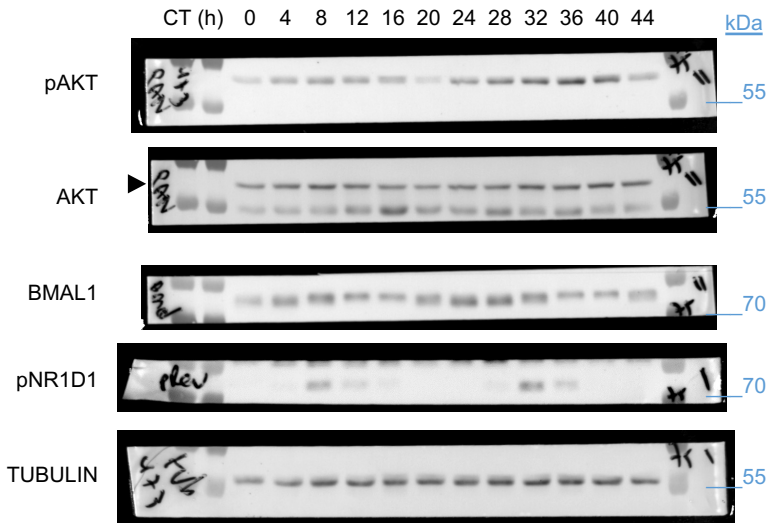

*Per1,2<sup>-/-</sup>*

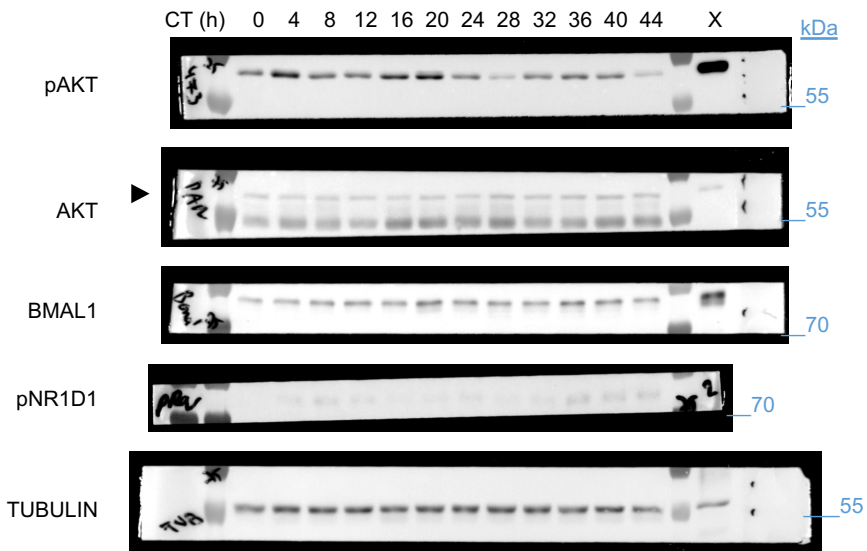

**Fig. 4C**

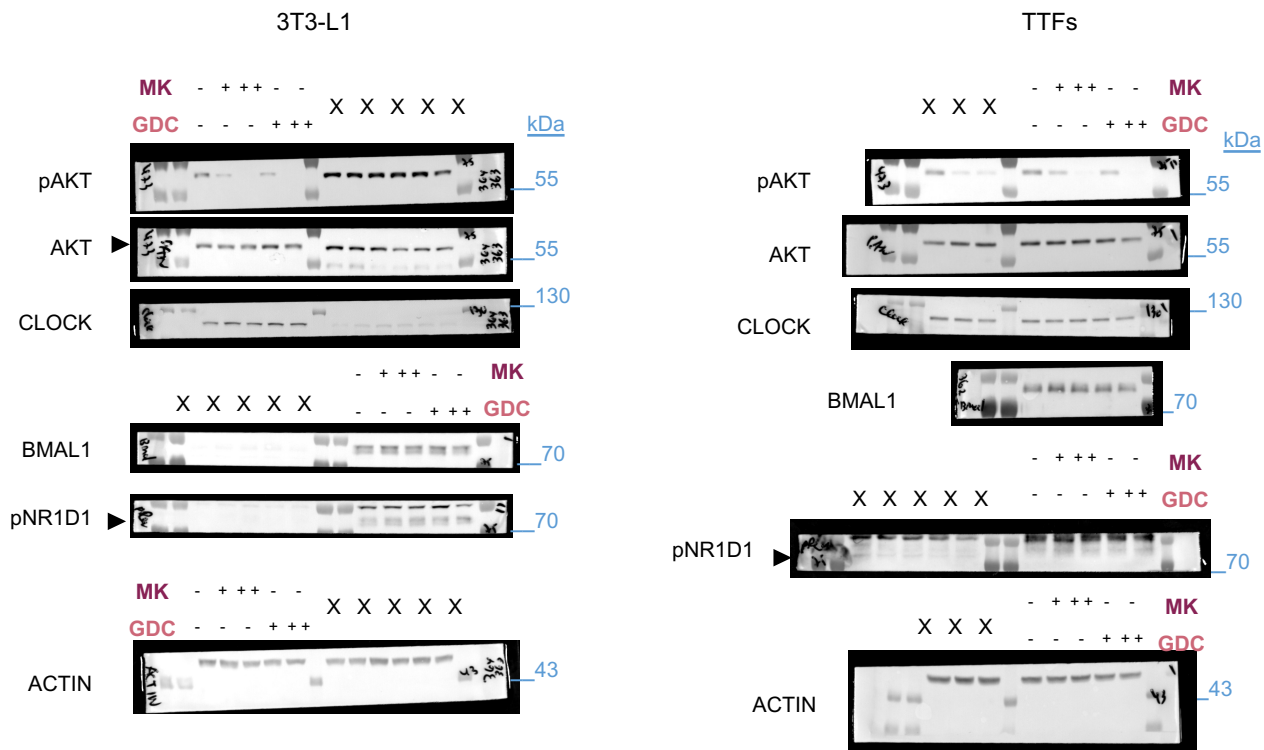



**Fig. S5A**

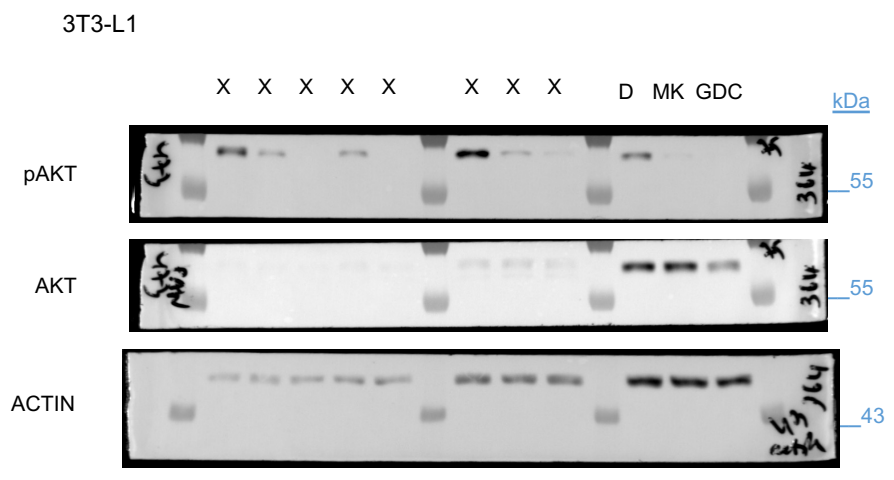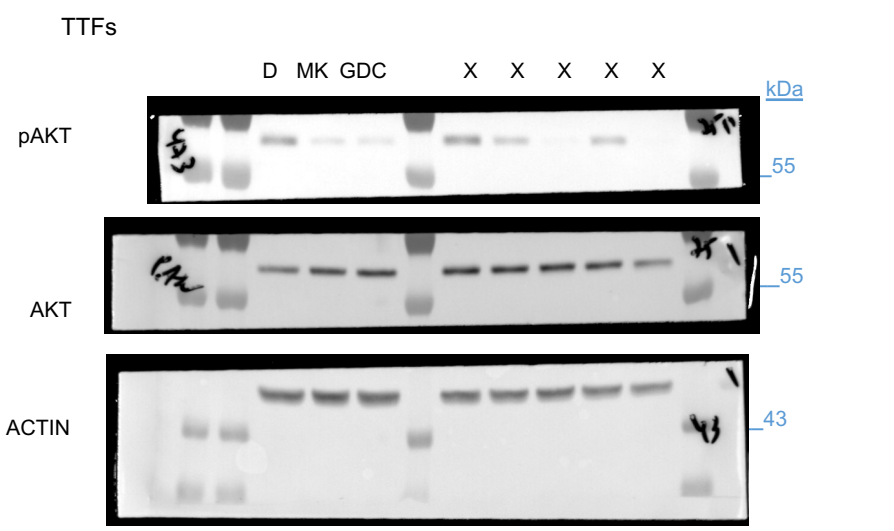

**Fig. S5B**

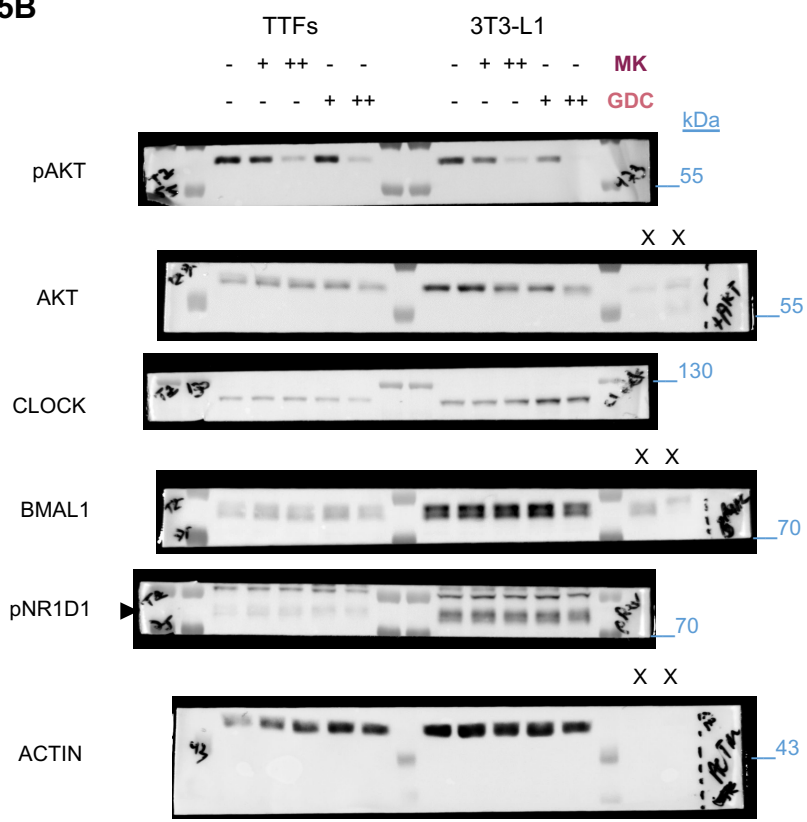

Supplement: pbio.3001492.s006.pdf [file pbio.3001492.s006.pdf]
